# Supplementary material
Source: PubMed Central journal article supplement (PMC3048329)
Supplement: jc.2010-2070_1.pdf [file jc.2010-2070_1.pdf]

**Supplemental Table 1. Genotype and allele frequencies of the studied variants in patients with CRPC.**

| Allelic variant <sup>†</sup>          | Effect       | n <sup>‡</sup> | Genotype frequencies <sup>§</sup> |           |           | Allele frequencies |          |
|---------------------------------------|--------------|----------------|-----------------------------------|-----------|-----------|--------------------|----------|
|                                       |              |                | Wt                                | Het       | Var       | <i>p</i>           | <i>q</i> |
| <i>Caucasians</i>                     |              |                |                                   |           |           |                    |          |
| <i>ERα</i> (rs2234693) <i>T&gt;C</i>  | IVS1-397C/T  | 128            | 25 (19.5)                         | 75 (58.6) | 28 (21.9) | 0.49               | 0.51     |
| <i>ERα</i> (rs9340799) <i>A&gt;G</i>  | IVS1-351A/G  | 129            | 42 (32.5)                         | 69 (53.5) | 18 (14.0) | 0.59               | 0.40     |
| <i>CYP19</i> (rs700519) <i>C&gt;T</i> | Exon 8 R264C | 130            | 125 (96.0)                        | 5 (4.0)   | 0 (0)     | 0.98               | 0.02     |
| <i>African Americans</i>              |              |                |                                   |           |           |                    |          |
| <i>ERα</i> (rs2234693) <i>T&gt;C</i>  | IVS1-397C/T  | 10             | 2 (20.0)                          | 4 (40.0)  | 4 (40.0)  | 0.40               | 0.60     |
| <i>ERα</i> (rs9340799) <i>A&gt;G</i>  | IVS1-351A/G  | 11             | 5 (50.0)                          | 3 (30.0)  | 2 (20.0)  | 0.65               | 0.35     |
| <i>CYP19</i> (rs700519) <i>C&gt;T</i> | Exon 8 R264C | 12             | 6 (50.0)                          | 6 (50.0)  | 0 (0)     | 0.75               | 0.25     |
| <i>Asians</i>                         |              |                |                                   |           |           |                    |          |
| <i>ERα</i> (rs2234693) <i>T&gt;C</i>  | IVS1-397C/T  | 4              | 0 (0)                             | 3 (0.75)  | 1 (0.25)  | 0.38               | 0.62     |
| <i>ERα</i> (rs9340799) <i>A&gt;G</i>  | IVS1-351A/G  | 4              | 1 (0.25)                          | 3 (0.75)  | 0 (0)     | 0.62               | 0.38     |
| <i>CYP19</i> (rs700519) <i>C&gt;T</i> | Exon 8 R264C | 4              | 1 (0.25)                          | 2 (0.50)  | 1 (0.25)  | 0.50               | 0.50     |

Abbreviations: *p*, frequency for wild type allele; *q*, frequency for variant allele; Wt, homozygous wild type allele patient; Het, heterozygous patient; Var, homozygous variant patient.

<sup>†</sup>Variants were in Hardy-Weinberg equilibrium in Caucasians regardless of disease status ( $P>0.05$ ). Both *ERα* SNPs demonstrated genetic linkage in Caucasians ( $D'=1.0$ ,  $R^2=0.66$ ,  $P<0.001$ ).

<sup>‡</sup>Genotype data was not available in all patients, as not all samples yielded sufficient DNA or were able to amplified by PCR.

<sup>§</sup>Number represents patients with percentage in parenthesis; the difference in the total number of patients is due to the fact that not all samples yielded sequencing data or showed PCR amplification. There were 3 patients with unknown races with the following genotype information:  $n=2$  *ERα* rs2234693 wt,  $n=2$  *ERα* rs9340799 wt,  $n=3$  *CYP19* rs700519 wt.
